# Supplementary material for: Ultrasonic-assisted in situ synthesis of MOF-199 on the surface of carboxylated cellulose fibers for efficient adsorption of methylene blue
Source: Royal Society of Chemistry journal article supplement (doi:10.1039/d4ra02099e), 2024-01-01
Supplement: d4ra02099e1.pdf [file d4ra02099e1.pdf]

## Supplementary information

### Ultrasonic-assisted in-situ synthesis of MOF-199 on the surface of carboxylated cellulose fibers for efficient adsorption of methylene blue

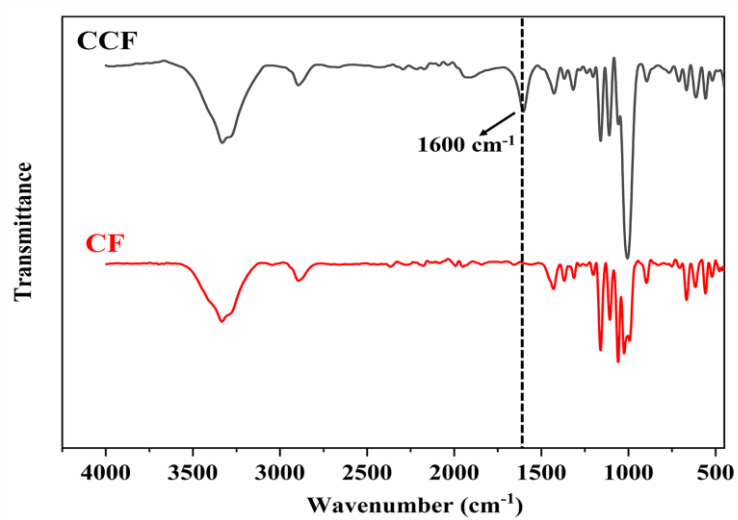

Fig. S1. FTIR spectra of CCF and CF.

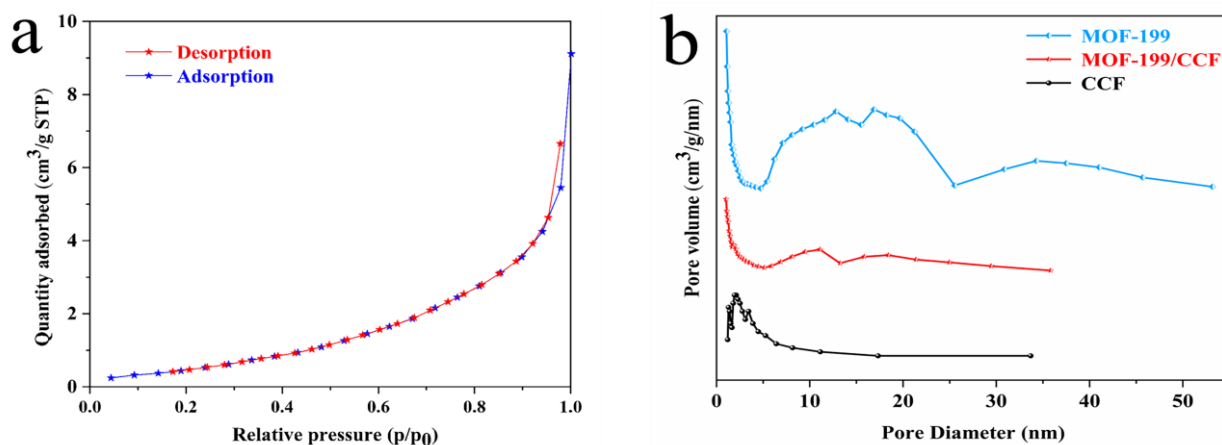

Fig. S2.  $\text{N}_2$  adsorption-desorption curves of CCF (a); Pore diameter distribution of the three materials (b).

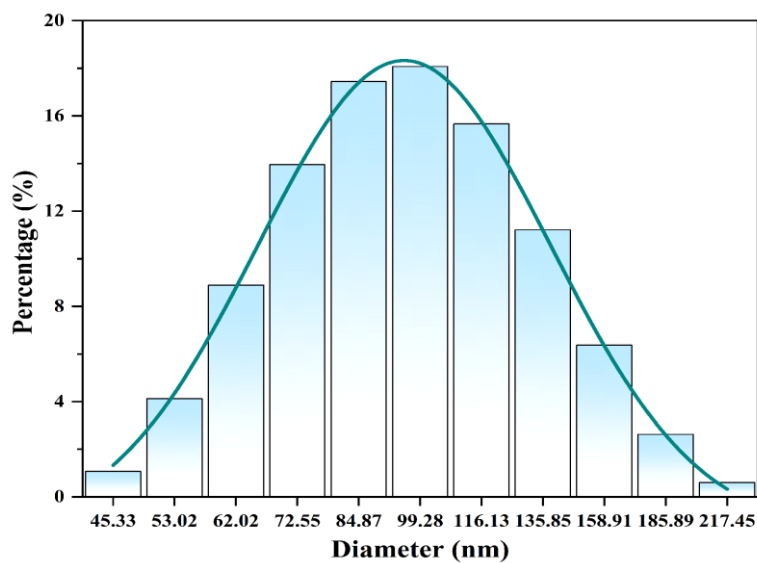

Fig. S3. Particle size distribution of MOF-199.

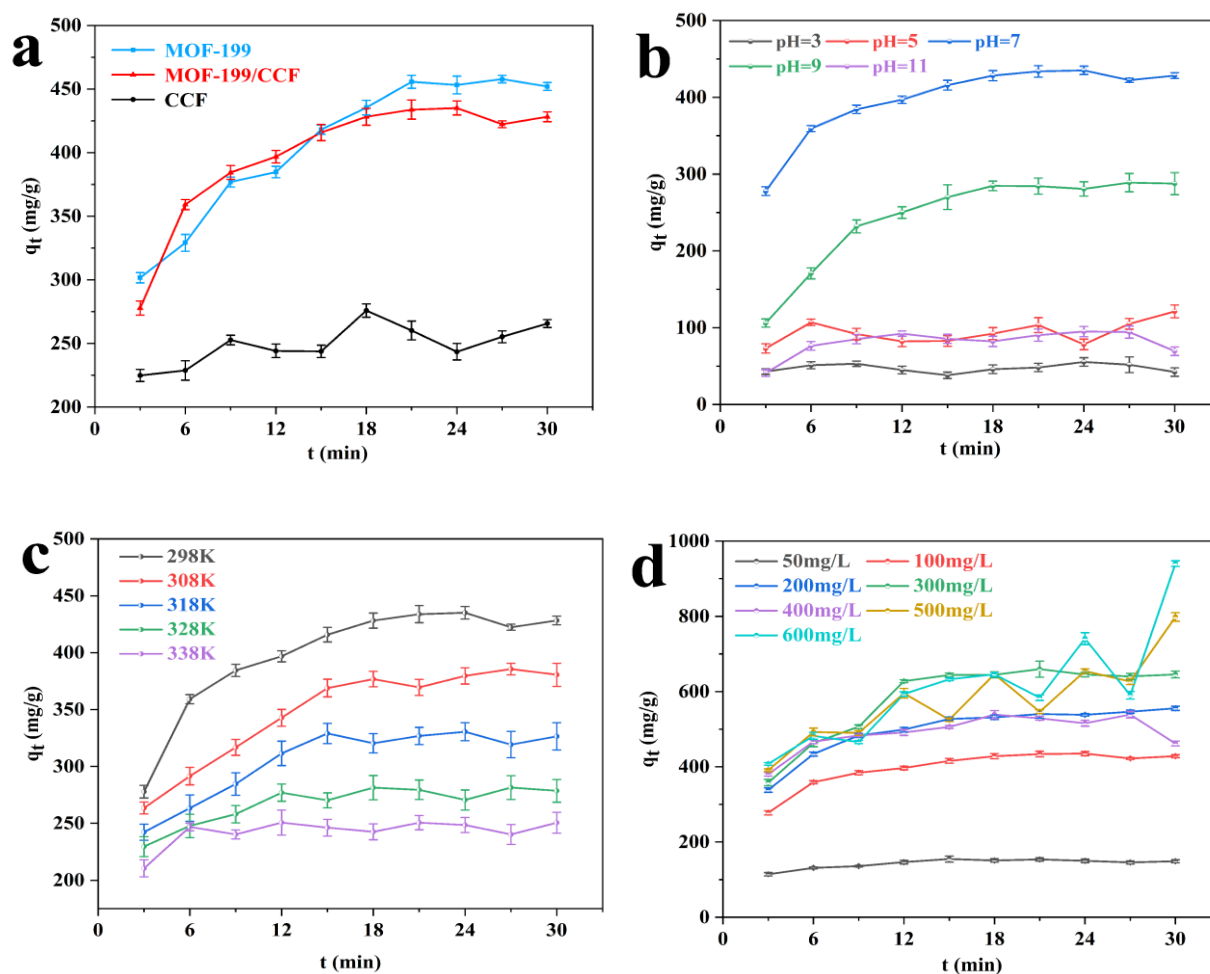

Fig. S4. Adsorption capacity over time: different adsorbents (a); pH (b); temperature (c); initial concentration (d).

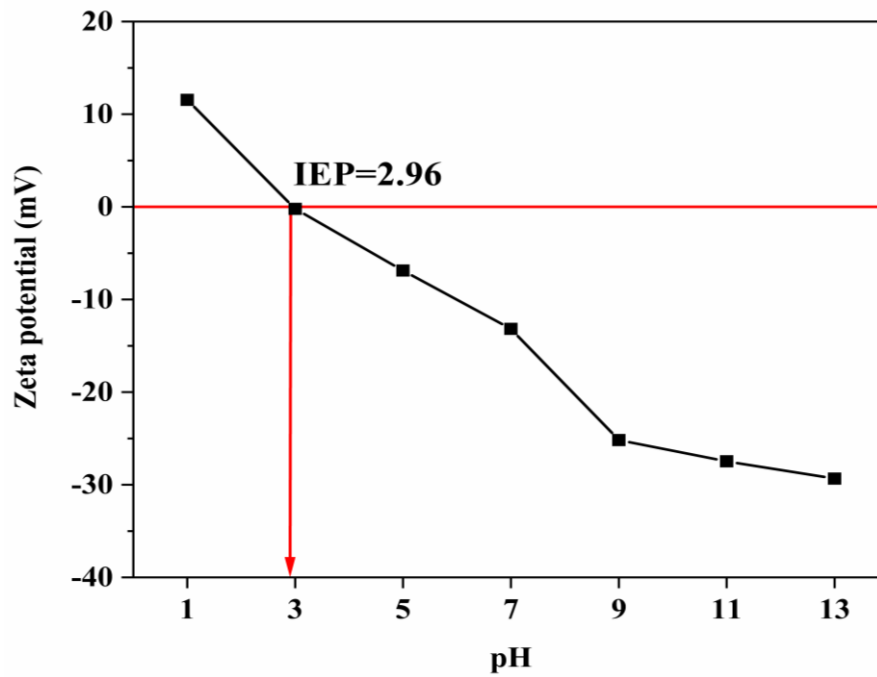

Fig. S5. The isoelectric point (IEP) of MOF-199/CCF.

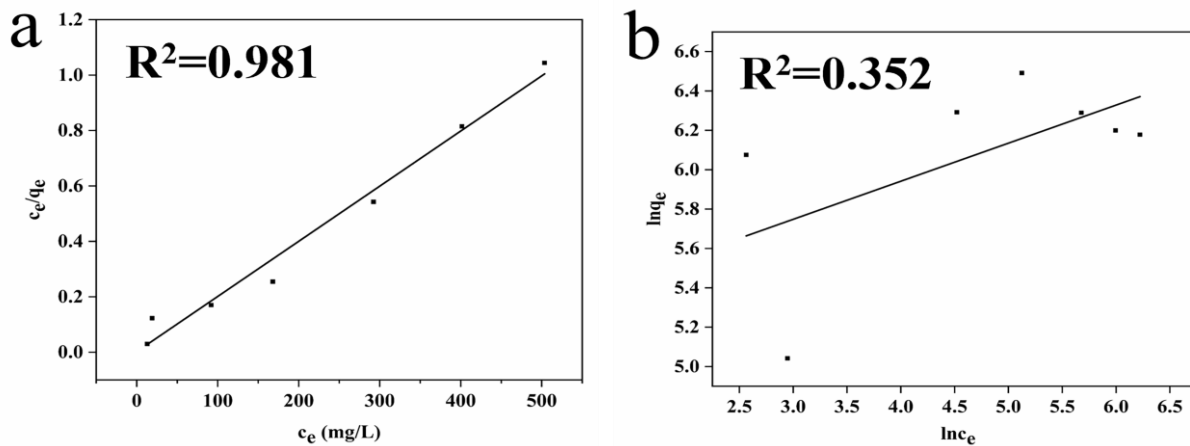

Fig. S6. Fitting results of MB on MOF-199/CCF by using Langmuir adsorption isotherm model (a); Fitting results of MB on MOF-199/CCF by using Freundlich adsorption isotherm model (b).

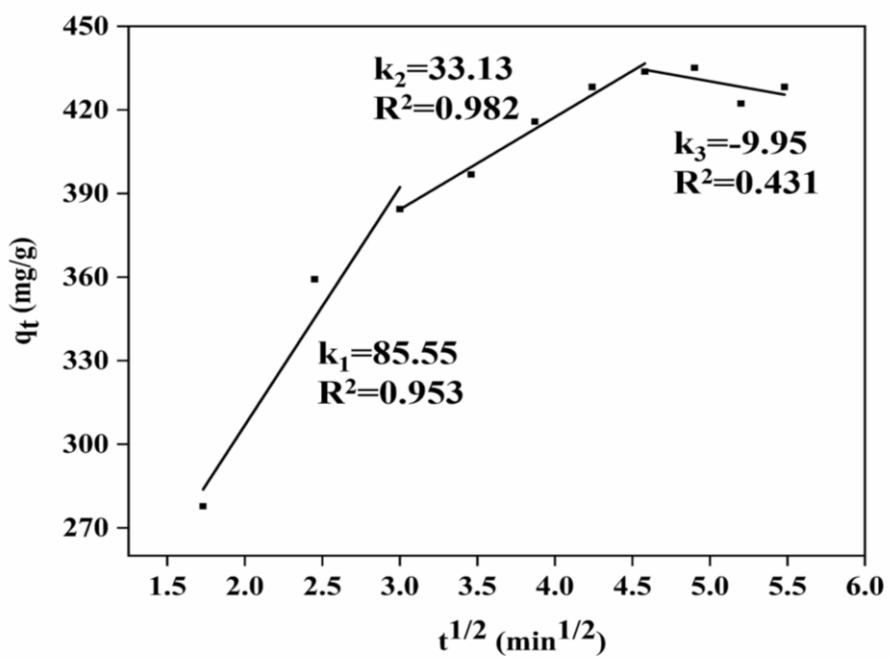

Fig. S7. Fitting results of MB on MOF-199/CCF by using Intra-particle diffusion model.

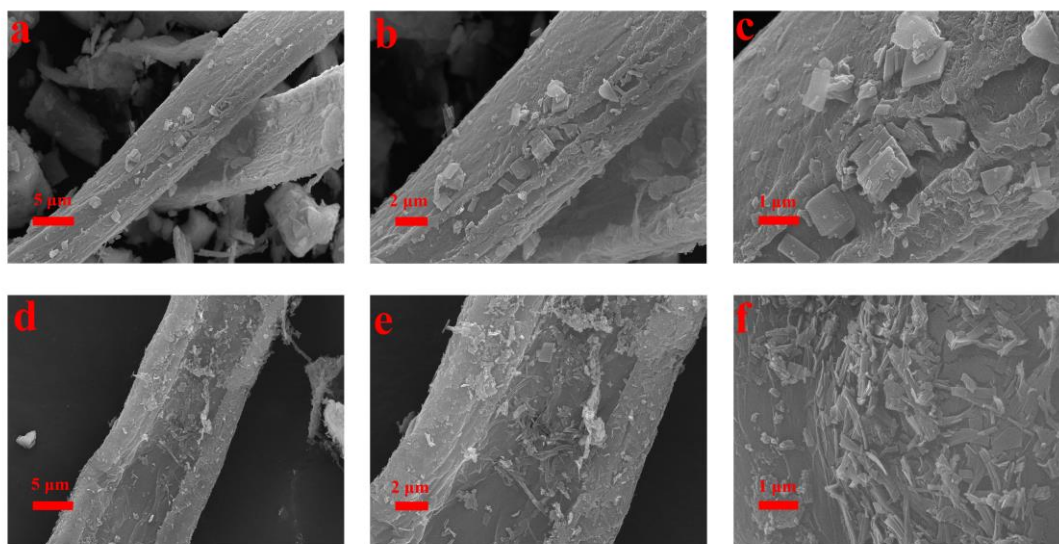

Fig. S8. After soaking in water for 5 days (a), (b) and (c); After 5 cycles of adsorption (d), (e) and (f).

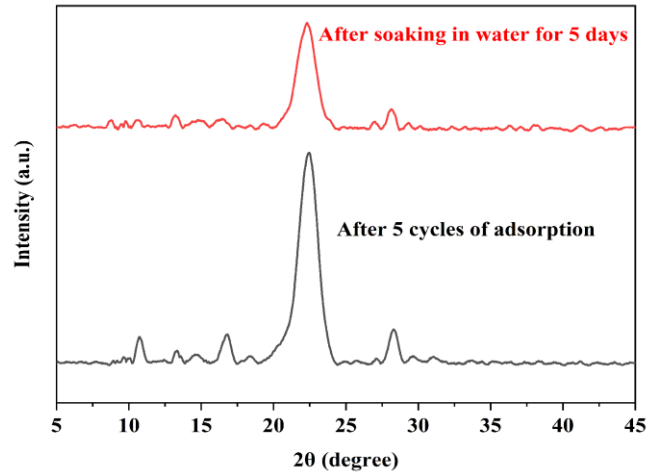

**Fig. S9. PXRD characterisation of MOF-199/CCF.**

### **Calculation method for percent composition of MOF-199/CCF.**

The amounts of MOF-199 growth in the MOF-199/CCF was calculated by ash content. In order to calculate the loading of MOF-199 on CCF, the thermogravimetric behaviors of MOF-199, MOF-199/CCF and CCF from room temperature to 800 °C were characterized by TGA. As shown in Fig. 2(b), the ash generation ratio of MOF-199, MOF-199/CCF and CCF are 33.55 wt%, 15.54 wt% and 2.70 wt% respectively. If we assume that the mass of MOF-199 in 100g MOF-199/CCF is ( $x$ ) g, then the mass of CCF is  $(100-x)$  g. And the mass loading ratio of MOF-199 on CCF can be calculated by Eq. S(1) and Eq. S(2):

$$x \cdot 33.55\% + (100 - x) \cdot 2.70\% = 100 \cdot 15.54\% \quad \text{S(1)}$$

$$W_{MOF-199} = x / 100 \cdot 100\% \quad \text{S(2)}$$

where  $W_{MOF-199}$  represents the mass loading ratio of MOF-199 on CCF. Combined with Eq. S(1) and Eq. S(2), it is calculated that the mass loading ratio of MOF-199 on CCF is around 41.62 wt%.

**Table S1****BET specific surface area and average pore diameter of the three materials.**

| MOF-199                                       |                            | MOF-199/CCF                                   |                            | CCF                                           |                            |
|-----------------------------------------------|----------------------------|-----------------------------------------------|----------------------------|-----------------------------------------------|----------------------------|
| BET specific surface area (m <sup>2</sup> /g) | Average pore diameter (nm) | BET specific surface area (m <sup>2</sup> /g) | Average pore diameter (nm) | BET specific surface area (m <sup>2</sup> /g) | Average pore diameter (nm) |
| 645.26                                        | 2.19                       | 264.83                                        | 2.53                       | 2.31                                          | 12.3                       |

**Table S2****Adsorption thermodynamic model parameters of MOF-199/CCF adsorption of MB.**

| $\Delta H$ (KJ·mol <sup>-1</sup> ) | $\Delta S$ (J·K <sup>-1</sup> ·mol <sup>-1</sup> ) | $\Delta G$ (KJ·mol <sup>-1</sup> ) |       |       |       |       |
|------------------------------------|----------------------------------------------------|------------------------------------|-------|-------|-------|-------|
|                                    |                                                    | 298K                               | 308K  | 318K  | 328K  | 338K  |
| -40.09                             | -106.50                                            | -8.35                              | -7.29 | -6.22 | -5.16 | -4.09 |

**Table S3****Pseudo-first-order kinetic and pseudo-second-order kinetic model parameters for the adsorption of MB by MOF-199/CCF.**

| $q_e$ (mg/g) experimental | Pseudo-first-order model |                            |       | Pseudo-second-order model |                                                               |       |
|---------------------------|--------------------------|----------------------------|-------|---------------------------|---------------------------------------------------------------|-------|
|                           | $q_e$ (mg/g) theoretical | $k_1$ (min <sup>-1</sup> ) | $R^2$ | $q_e$ (mg/g) theoretical  | $k_2 \times 10^{-3}$ (g·mg <sup>-1</sup> ·min <sup>-1</sup> ) | $R^2$ |
| 435.1                     | 418.1                    | 0.2397                     | 0.922 | 454.5                     | 1.35                                                          | 0.998 |
